03/09/19

# Centrosome and ciliary abnormalities in fetal akinesia deformation sequence human fibroblasts

Ramona Jühlen<sup>1</sup>, Jeroen Breckpot<sup>2</sup>, and Birthe Fahrenkrog<sup>1,\*</sup>

<sup>1</sup>Institute of Molecular Biology and Medicine, Université Libre de Bruxelles, 6041

Gosselies, Belgium; <sup>2</sup>Center for Human Genetics, University Hospitals Leuven,

Catholic University Leuven, Leuven, Belgium

\*Corresponding author: [bfahrenk@ulb.ac.be](mailto:bfahrenk@ulb.ac.be)

key words: fetal akinesia deformation sequence; primary cilia; ciliopathies; rapsyn;

NUP88; cytoskeleton; tubulin

03/09/19

## Abstract

Ciliopathies are clinical disorders of the primary cilium with widely recognized phenotypic and genetic heterogeneity. Here we found that impaired ciliogenesis in fibroblasts derived from individuals with fetal akinesia deformation sequence (FADS). FADS refers to a broad spectrum of neuromuscular disorders arising from impaired fetal movement. We show that cells derived from two FADS individuals, one with an unknown genetic cause and one with bi-allelic pathogenic variants in *RAPSN*, have shorter and less primary cilia (PC), in association with alterations in posttranslational modifications in  $\alpha$ -tubulin. Similarly, siRNA-mediated depletion of two known FADS proteins, the scaffold protein rapsyn and the nucleoporin NUP88, resulted in defective PC formation. Consistent with a role in ciliogenesis, rapsyn and NUP88 localized to centrosomes and PC. By proximity-ligation assays, we show that rapsyn and NUP88 are interacting and that both proteins are connecting to all three tubulin isoforms ( $\alpha$ ,  $\beta$ , and  $\gamma$ ). The rapsyn-NUP88 interface, as well as their contact to microtubules, is perturbed in the examined FADS cells, similarly to their contact to microtubules. We suggest that the perturbed rapsyn-NUP88-tubulin interface leads to defects in PC formation and that defective ciliogenesis contributes to the pleiotropic defects seen in FADS.

03/09/19

## Introduction

Fetal akinesia deformations sequence (FADS), the severest form of congenital myasthenic syndromes (CMS), encompasses a broad spectrum of disorders, sharing the inability of the fetus to initiate movement (Beecroft et al., 2018; Engel, 2012; Hall, 2009; Ravenscroft et al., 2011). As a result, affected fetuses suffer from multiple joint contractures, including rocker-bottom feet, facial anomalies and lung hypoplasia. In many cases, FADS individuals are born prematurely or stillborn, and a high percentage of live-births die due to respiratory failure.

FADS and CMS can be caused by gene mutations that lead to dysfunction of the neuromuscular system, whereby in 68% of cases the defect is postsynaptic, i.e. in the skeletal muscle cells (Engel, 2012). The most frequent mutations are found in three genes, namely *RAPSN* (receptor-associated protein of the synapse, rapsyn; (Vogt et al., 2008; Winters et al., 2017)), *DOK7* (downstream of tyrosine kinase 7; (Vogt et al., 2009)) and *MUSK* (muscle specific kinase; (Tan-Sindhunata et al., 2015; Wilbe et al., 2015)), all of which are important regulators of acetylcholine receptor (AChR) formation and maintenance at the neuromuscular junction (NMJ; (Burden et al., 2018; Michalk et al., 2008)). The NMJ (also called neuromuscular synapse) is a type of synapse formed between motoneurons and the skeletal muscle fibers that, in vertebrates, use acetylcholine as neurotransmitter (Burden, 2002; Wu et al., 2010). Mutations in the subunits of the muscular nicotinic AChR have also been described in CMS and FADS (Michalk et al., 2008). We have recently expanded the spectrum of genetic causes for FADS by reporting bi-allelic, loss-of-function mutations in the nucleoporin *NUP88* as cause for a lethal form of FADS (Bonnin et al., 2018).

MuSK and rapsyn are scaffold proteins that play key roles in AChR clustering and NMJ formation. MuSK, a muscle-specific receptor tyrosine kinase, is activated by the

03/09/19

extracellular matrix protein agrin upon agrin-binding to Lpr4, a member of the low-density lipoprotein receptor family (Kim and Burden, 2008; Kim et al., 2008; Luiskandl et al., 2013; Mazhar and Herbst, 2012; Zhang et al., 2008; Zhang et al., 2011). Activated MuSK induces co-clustering of rapsyn and AChRs (Ghazanfari et al., 2011; Marchand et al., 2000; Marchand et al., 2002; Moransard et al., 2003) and downstream signaling of MuSK requires binding of DOK7 to the phosphotyrosine-binding site in MuSK (Okada et al., 2006). Signaling downstream of MuSK is only poorly understood, but it involves interactions of both MuSK and rapsyn to all three cytoskeleton networks, i.e. microtubules, the actin cytoskeleton and intermediate filaments (Aittaleb et al., 2015; Antolik et al., 2007; Bartoli et al., 2001; Dobbins et al., 2008; Ghasemizadeh et al., 2019; Li et al., 2016; Luiskandl et al., 2013; Mihailovska et al., 2014; Moransard et al., 2003; Oury et al., 2019). Rapsyn has, moreover, been found in non-muscle cell types (Frail et al., 1989; Musil et al., 1989) and plays a role in lysosome clustering (Aittaleb et al., 2015).

Primary cilia (PC) are discrete, non-motile microtubule-based organelles that protrude from the surface of most quiescent vertebrate cells. PC communicate extracellular signals to the cell, thereby controlling important developmental signaling pathways, such as hedgehog, Wnt, and Notch (Garcia et al., 2018; Schou et al., 2015). The core structure of the PC, the axoneme, is composed of nine, ring-forming, parallel doublets of microtubules that nucleate from the basal body and are surrounded by a ciliary membrane (Avalos et al., 2017). Doublets consist of a complete A-tubule scaffolding a partial B-tubule (Mirvis et al., 2018). Within the PC, tubulin is subjected to distinct post-translational modifications, in particular acetylation, glutamylation/detyrosination, and glycylation, which control PC assembly and length (Gadadhar et al., 2017; Keeling et al., 2016). Additionally, the PC requires a

03/09/19

bidirectional transport system, known as intraflagellar transport (IFT), that transfers and correctly localizes proteins required for PC growth, maintenance and signaling (Avalos et al., 2017). The A-tubule binds the IFT retrograde motor protein dynein and the B-tubule binds the IFT anterograde motor protein kinesin-II (Mirvis et al., 2018). Besides IFT, two additional, IFT-independent routes within the lumen of PC are known: passive diffusion and vesicle trafficking (Luo et al., 2017; Ruba et al., 2019). The ciliary proteome is composed of more than 1300 proteins and about 52 subcomplexes (Boldt et al., 2016). Defects in function or structure of the PC give rise to pleiotropic genetic disorders and manifestations include brain malformations, facial anomalies, neurodevelopmental disorders, such as Joubert syndrome, congenital heart defects, trisomy 21, and skeletal malformations (Galati et al., 2018; Reiter and Leroux, 2017; Wang and Dynlacht, 2018).

Here we provide evidence that defects in ciliogenesis contribute to the pleiotropic defects seen in FADS.

03/09/19

## Results

### *Nuclei of FADS fibroblasts are frequently misshapen and lobulated*

While genetic causes and clinical features of FADS are relatively well described, cellular consequences of pathogenic variants in FADS-related genes are largely unknown. We therefore pursued a cell biological characterization of fibroblasts derived from two FADS individuals: one with unknown genetic cause (FADS 1) and a second one with a homozygous c.484G>A (p.Glu162Lys) variant of *RAPSN* (FADS 2; (Winters *et al.*, 2017)). Confocal microscopy revealed that fibroblasts derived from these individuals, in contrast to normal human fetal fibroblasts (MRC5), often had nuclei with abnormal shape and a lobulated nuclear envelope (NE), similar to fibroblasts from Hutchinson-Gilford progeria syndrome (HGPS) patients (Fig. 1, A and B). Nuclear shape and contour irregularities were visualized by immunofluorescence studies with antibodies against lamin A/C (LA/C; Fig. 1 A) and lamin B1 (LB1; Fig. 1 B). Despite these similar variations in nuclear morphology in FADS and HGPS fibroblasts, expression of lamin A/C and lamin B1 in FADS fibroblasts was, other than in HGPS, comparable to MRC5 control cells (Fig. 1 C).

### *FADS fibroblasts are less proliferative*

To further characterize FADS fibroblasts in comparison to normal fetal fibroblasts, we subsequently analyzed the proliferation of these cells. First, we determined the proliferation rate of cultured FADS fibroblasts in comparison to MRC5 fibroblasts. As shown in Fig. 2 A, growth rates of FADS fibroblasts were significantly decreased compared to the MRC5 control: the growth constant  $k$ , i.e. slope of linear regression line, was 0.0039 for FADS 1, 0.0050 for FADS 2, and 0.0079 for MRC5. Next, we defined the percentage of cells positive for the proliferation marker Ki-67. Ki-67

03/09/19

marks cells in all active phases of the cell cycle, i.e. G1, S, G2, and M phase (Gerdes et al., 1984). As shown in Fig. 2 B, about 55% of MRC5 and ~60% of FADS 2 fibroblasts were in the active phases of the cell cycle, while less than 40% of FADS 1 cells were Ki-67 positive. To more specifically determine the proliferation rate, we analyzed DNA synthesis by incorporation of 5-ethynyl-20-deoxyuridine (EdU), a thymidine analog which is incorporated into newly synthesized DNA upon replication (Buck et al., 2008). EdU incorporation revealed that DNA synthesis in both FADS fibroblast lines was significantly reduced as compared to MRC5 cells (Fig. 2 C). Together these data indicate that FADS fibroblasts have a reduced proliferation rate, but not necessarily a reduced proliferative state. The reduced proliferation rate did only coincide with a marked increase in cellular senescence in FADS 1 fibroblasts, as revealed by  $\beta$ -galactosidase staining (Fig. 2 D).

### ***Centrosomal and microtubule nucleation anomalies in FADS fibroblasts***

In order to better understand proliferative defects that coincide with FADS and given the link of rapsyn (and MuSK) to the cytoskeleton, we next examined properties of microtubules (MTs) and mitotic spindles in FADS cells. After cold-treatment, we observed abnormal sloppy tubulin spindles in late stages of mitotic FADS 1 fibroblasts (Fig. S1 A), whereas the overall stability of MTs using high and low amounts of nocodazole was not altered in FADS 1 fibroblasts (Fig. S1 B). When monitoring the regrowth of MTs after cold-induced depolymerization, regrowth from the centrosome near the NE occurred within 30 s of rewarming to 37°C in MRC5 cells (Fig. 3 A). In FADS 1 and FADS 2 cells, however, MT regrowth was initiated at random sites in the cytoplasm during the first 30 s of rewarming and at altered speed.

03/09/19

FADS 1 fibroblasts had increased, whereas FADS 2 fibroblasts had decreased polymerization/growth speed (Fig. 3 A, 90 s).

The centrosome is generally the main microtubule organizing center (MTOC) and is responsible for nucleating microtubules (Petry and Vale, 2015). Due to the acentrosomal nucleation of MTs observed in FADS fibroblasts, we next analyzed their centrosome number and position. Staining of fibroblasts with  $\gamma$ -tubulin antibodies (Fig. 3 B) revealed that FADS fibroblasts have abnormal centrosome numbers, i.e. more than two (Fig. 3 C). Whereas only about 1% of MRC5 cells had more than two centrosomes, in FADS fibroblasts the percentage increased to 7-8%. Moreover, centrosomes in FADS cells were more frequently found at larger distance from the nucleus in comparison to control cells (Fig. 3 D). Immunostaining with centrin-3 antibodies revealed that centriole number in FADS fibroblasts, however, appeared normal, i.e. each centrosome is comprised of two centrioles (Fig. 3 E).

### ***Ciliary abnormalities in FADS fibroblasts***

Centrosome abnormalities are frequently associated with human disease, not only cancer, but also ciliopathies (Bettencourt-Dias et al., 2011). Considering the pleiotropic developmental abnormalities that characterizes fetal akinesia, we explored whether defects in primary cilia (PC) formation may contribute to the disease. To address the question, MRC5 control and FADS fibroblasts were subjected to serum-starvation and PC formation was analyzed by immunofluorescence microscopy using antibodies against acetylated  $\alpha$ -tubulin and Arl13b (ADP ribosylation factor like GTPase 13b), a ciliary marker protein. By both,  $\alpha$ -tubulin (Fig. 4 A) and Arl13b (Fig. 4 B) immunostaining, we found that PC were significantly shorter in FADS fibroblasts compared to control cells, and we showed that the percentage of ciliated



03/09/19

cells was smaller. The reduced PC length appears to arise from defects in cilia growth, as PC resorption in FADS fibroblasts was similar to control cells, i.e. not enhanced (Fig. S2 A). In contrast to FADS, HGPS and other laminopathies do not coincide with PC defects (Fig. S2 B).

PC growth and length is regulated by changes in post-translational modifications of  $\alpha$ -tubulin, in particular acetylation and detyrosination (Gadadhar et al., 2017). Consistent with defects in PC growth, we found by immunoblotting that the levels of acetylated and detyrosinated  $\alpha$ -tubulin were significantly lower in FADS fibroblasts as compared to MRC5 cells, both in growing cells (Fig. 4 C) and starved cells (Fig. 4, D and E). The levels of overall  $\alpha$ -tubulin and  $\beta$ -tubulin were similar in FADS and control cells (Fig. 4, C-E). Similarly, we observed PC defects in FADS fibroblasts grown on crossbow-shaped micropatterns and stained for acetylated and detyrosinated  $\alpha$ -tubulin (Fig. S2 C).

### ***Depletion of FADS proteins causes ciliary defects***

To support the idea that FADS in more general is a ciliopathic disease, we next depleted rapsyn and NUP88 from MRC5 fibroblasts by RNA interference. Mutations in either gene are known genetic causes for FADS (Bonnin et al., 2018; Michalk et al., 2008; Vogt et al., 2008; Winters et al., 2017). 48 h after siRNA transfection, cells were subjected to serum-starvation to initiate cell cycle exit and PC formation. We found that PCs were significantly shorter upon the respective depletion of rapsyn and NUP88 from MRC5 cells, as revealed by acetylated  $\alpha$ -tubulin (Fig. 5, A and B) and Arl13b (Fig. 5, A and C) staining and immunofluorescence microscopy. Similarly, siRNA-mediated depletion of MuSK, another key factor in the pathogenesis of FADS,

03/09/19

resulted in shorter PC (Fig. S3 A). Depletion levels of the particular protein were determined by Western blot and quantified (Fig. S3, B-E).

### ***FADS proteins localize to centrosomes and cilia***

We next determined the intracellular localization of rapsyn in MRC5 and FADS fibroblasts. As shown in Fig. 6 A, rapsyn is distributed throughout the cytoplasm and enriched at centrosomes in all three cell lines. To confirm the association of rapsyn with centrosomes, we performed co-localization experiments and found that rapsyn indeed co-localized with  $\gamma$ -tubulin at centrosomes in methanol-fixed MRC5 fibroblasts (Fig. 6 B). The association of rapsyn with centrosomes was additionally confirmed in the human skeletal muscle precursor rhabdomyosarcoma cell line RH30 (Fig. 6 B). Moreover, also NUP88 localized to centrosomes in MRC5 and RH30 cells (Fig. 6 B), in contrast to its partner nucleoporins NUP214 and NUP62 as well as NUP93 and NUP153 (Fig. S4 A).

In view of the strong link between centrosomes and PC (Chavali et al., 2014; Gupta et al., 2015), we examined the localization of rapsyn and NUP88 in serum-starved, ciliated MRC5 and FADS fibroblasts. In MRC5 cells, we detected rapsyn at the cilia base (Fig. 6 C) and NUP88 along the axoneme of the PC (Fig. 6 D), similar to its partner nucleoporins NUP214 and NUP62 (Fig. S4 B). Recruitment of rapsyn and NUP88 to the PC was not affected in FADS 1 and FADS 2 fibroblasts, despite the homozygous point mutation of *RAPSN* (c.484G>A) in FADS 2 cells (Fig. 6, C and D; Table 1). Besides rapsyn and NUP88, we also detected the FADS protein DOK7 at axoneme in MRC5 and FADS fibroblasts (Fig. S4 C), in contrast to MuSK, which did not locate to the cilia base or to axoneme (Fig. S4 D).

03/09/19

To further support the link between rapsyn and NUP88 on the one hand and centrosomes and the PC on the other, we next executed proximity ligation assays (PLA). By PLA, proteins adjacent to the protein of interest with a maximum distance of 40 nm can be detected as a PLA amplification foci (Duolink® PLA Troubleshooting Guide). As shown in Fig. 7 A, PLA signals in the cytoplasm of MRC5 fibroblasts were detected for rapsyn with the three tubulin isoforms, i.e.  $\alpha$ -tubulin,  $\beta$ -tubulin, and  $\gamma$ -tubulin, as well as with NUP88. Such rapsyn/ $\alpha$ -tubulin and rapsyn/NUP88 PLA signals were absent in FADS 1 and FADS 2 fibroblasts (Fig. 7, A and B). In FADS 2, rapsyn/ $\beta$ -tubulin PLA signals were lacking, whereas they were increased in FADS 1 (Fig. 7, A and B). Rapsyn/ $\gamma$ -tubulin PLA signals were similar to MRC5 in FADS fibroblasts (Fig. 7 B).

Similarly, PLA signals in MRC5 were detected for NUP88 and  $\beta$ -tubulin and  $\gamma$ -tubulin, and very slightly  $\alpha$ -tubulin (Fig. 7 C). PLA signals for NUP88/ $\alpha$ -tubulin and NUP88/ $\beta$ -tubulin were increased in FADS 1 and FADS 2 (Fig. 7 D). In FADS 2, NUP88/ $\gamma$ -tubulin PLA signals were similar to MRC5, whereas they were slightly increased in FADS 1 (Fig. 7 D). A schematic summary of the PLA results is illustrated in Fig. 8 A and control PLA are presented in Fig. S5 A.

03/09/19

## Discussion

FADS is a clinically and genetically heterogeneous constellation, which is characterized by reduced or lack of fetal movement *in utero*. While in the past few years, due to the increased availability of next generation sequencing, significant advances have been made in understanding the molecular etiology of FADS, the cellular consequences of FADS-related mutations have previously remained largely unstudied. Here we provide evidence that FADS coincides with defects in ciliogenesis, which may account for the pleiotropic morphological defects seen in FADS individuals. We show that primary cilia (PC) length is reduced in fibroblasts derived from two FADS individuals (Fig. 4) and that the respective depletion of the FADS proteins rapsyn, NUP88 and MuSK from control fibroblasts is similarly resulting in shorter PC (Fig. 5, Fig. S3 A). Hence, ciliopathic disease underlies the pathogenesis of FADS, at least in a subset of patients.

### *FADS fibroblasts have shorter primary cilia*

Important for the regulation of PC length are tubulin posttranslational modifications (PTMs). PTMs of  $\alpha$ -tubulin have been linked to a variety of human pathogenic phenotypes (Magiera et al., 2018). Axonemal microtubules (MTs) are a common target for several PTMs, and the amount of PTMs increases during maturation of the cilium, distinguishing mature cilia from assembling/immature cilia (Wloga et al., 2017). Stable MTs are marked by acetylation, and axonemal MTs are a common target for acetylation contributing to ciliogenesis and ciliary mechano-sensing (Aguilar et al., 2014; Shida et al., 2010). Detyrosinated  $\alpha$ -tubulin is enriched at the B-tubules (Johnson, 1998). Since the anterograde intraflagellar transport (IFT) moves along B-tubules, detyrosination has been suggested to stimulate anterograde

03/09/19

IFT (Sirajuddin et al., 2014). The ‘tubulin code’, which defines, besides  $\alpha$ -tubulin PTMs, also the unique composition of the different tubulin isotypes, is a crucial characteristic of axonemal MTs (Verhey and Gaertig, 2007). Indeed, it has been shown in *C. elegans*, that the loss of the  $\alpha$ -tubulin isotype leads to abnormal axoneme ultrastructure and impaired cilia transport (Silva et al., 2017). Interestingly, our PLA results show that, in particular, the positive PLA signal between rapsyn and  $\alpha$ -tubulin is lost in both FADS cell lines (Fig. 7 A). Thus, we hypothesize that a distinct alteration in the ‘tubulin code’, including PTMs, in FADS cells adds to the observed PC defects and probably results in a decreased amount of mature cilia (Fig. 4, Fig. 5, Fig. 8 B). We consider indeed defects in anterograde IFT and PC maturation as causative for the reduced PC length and number in FADS, as resorption of PC is similar in FADS and control fibroblasts (Fig. S2 A), indicating a regular retrograde IFT. Axonemal MTs can be seen as extensions of the cytoplasmic MT network, which plays an important role in the regulation of cilia by maintaining the balance of available tubulin (Sharma et al., 2011). We are currently examining how the cytoplasmic MT network is organized in FADS cells and can contribute to PC impairments.

### ***The role of rapsyn and NUP88 in ciliogenesis***

How do rapsyn and NUP88 come into the game? A striking connection between nucleoporins, the nucleocytoplasmic transport machinery and cilia is known since quite some years, but the function of nucleoporins at cilia has remained largely obscure (for review see: (Johnson and Malicki, 2019)). A proteomic screen has recently identified NUP88 as part of the cilia proteome (Boldt et al., 2016). Consistent with the localization of NUP88 to the axoneme of ciliated cells (Fig. 6 D), NUP88

03/09/19

appears to be part of the Bardet-Biedl Syndrome (BBSome) coat complex, in complex with DYNLT1 and the WDR19/IFT-A complex (Boldt et al., 2016). Similar to NUP88, we also detected its complex partners NUP214 and NUP62 at the axoneme, in contrast to other nucleoporins, such as NUP98 and NUP93 (Fig. S4 B). In contrast to our data presented here, NUP214 and NUP62 have both been previously localized to the cilia base and transition zone (Kee et al., 2012; Takao et al., 2017). This discrepancy might arise from two obvious differences: we examined the endogenous proteins by employing antibodies, whereas in previous studies epitope-tagged versions of NUP214 and NUP62 were analyzed. Alternatively, species-specific differences between human (in our study) and rat or mice (in the previous studies) cells/cilia may play a role. Further studies are required to untangle this inconsistency.

NUP88 together with NUP214 and NUP62 has crucial roles in nuclear export by interacting with nuclear export receptors (Bernad et al., 2006; Hutten and Kehlenbach, 2006). Briefly, cargoes are carried from the nucleus to the cytoplasm by nuclear export receptors regulated by the small GTPase Ran. There is emerging evidence that the nuclear export receptor CRM1 regulates non-centrosomal (nc) MT nucleation in a RanGTP-dependent mechanism, and that depletion of CRM1 in yeasts results in increased ncMT nucleation after cold-treatment (Bao et al., 2018; Huang and Avasthi, 2019). Furthermore, Gle1, which has a crucial role in mRNA export and is closely associated with the nuclear pore complex, has been shown to locate to centrosomes and the basal body, and to regulate MT organization (Jao et al., 2017). It is tempting to speculate that the increased levels of random ncMT nucleation after cold-treatment in FADS cells (Fig. 3 A) are caused by similar mechanisms, and thus impair PC formation (Fig. 8 B), alter mitotic spindles (Fig. S1 A) and concomitantly results in the lower proliferation rates of FADS fibroblasts (Fig. 2). It will be interesting to see

03/09/19

how NUP88 is recruited to centrosomes and MTs, whether this involves similar mechanisms as described for the muscle-specific  $\alpha$ -isoform of nuclear envelope protein Nesprin1/SYNE1 (Potter et al., 2018; Potter et al., 2017). Of note, mutations in *SYNE1* have also been described in FADS cases (Attali et al., 2009).

With respect to NUP88 and its association with the BBSome, it has previously been shown, in *C. elegans* and mice, that defects in BBSome components result in defective IFT, which is important for cilium growth, and morphological defects of the cilia (Blacque et al., 2004; Eguether et al., 2014; Keeling et al., 2016; Ou et al., 2007; Rosenbaum and Witman, 2002). This suggests that NUP88 may play a role in IFT as well and that its loss consequently impairs IFT and cilia growth. Future mechanistic studies should eventually provide more insights in this regard. Interestingly, mutations in WDR19, a binding partner of NUP88 in the BBSome (Boldt et al., 2016), are associated with, for example, cranioectodermal dysplasia 4 (CED4), a disorder primarily characterized by craniofacial, skeletal and ectodermal abnormalities (Bredrup et al., 2011).

Rapsyn has thus far not been associated with the cilium. Its localization at centrosomes (Fig. 6, A and B) and at the cilia base (Fig. 6 C), however, strongly supports the idea that it plays a role in ciliogenesis. This notion is further strengthened by our PLA assays: firstly, the association between rapsyn and  $\alpha$ -tubulin,  $\beta$ -tubulin, and  $\gamma$ -tubulin in PLA assays (Fig. 7 A) and, secondly, the disruption of the rapsyn/ $\alpha$ -tubulin/ $\beta$ -tubulin in FADS fibroblasts correlates with impaired ciliogenesis in these cells (Fig. 4, Fig. 7 A). Interestingly, MACF1 (microtubule-actin crosslinking factor) has been recently identified to bind to AChRs in a rapsyn-dependent manner (Oury et al., 2019). MACF1 is a microtubule plus end-binding protein shown to promote persistent microtubule growth and to connect the actin and microtubule cytoskeletal

03/09/19

network (Leung et al., 1999). This novel interaction of rapsyn with MACF1 can be the link to its role in ciliogenesis (Fig. 8 B). Interestingly, our PLA results suggest that the close association between rapsyn and NUP88 primarily takes place at the  $\beta$ -tubulin/MT plus end (PLA signals are only slightly positive for NUP88/ $\alpha$ -tubulin in MRC5) and that this association is lacking in FADS cells (Fig. 8 A). In FADS 2, the mutant rapsyn no longer associates in proximity to  $\beta$ -tubulin (Fig. 7 A), whereas in FADS 1 another, yet to characterize, mechanism may account for the abolished association of rapsyn/NUP88 at the MT plus end (Fig. 7A). At the MT minus end, the association of NUP88 is increased in both FADS cell lines, either revealing a loss of regulation or a compensatory mechanism (Fig. 8 A). The PLA results at the MT level cannot be directly translated to PC, since further mechanism are regulating ciliogenesis, nevertheless they are hinting to an altered interface between axonemal MTs and rapsyn and NUP88, respectively. Future studies will be required to unravel the underlying molecular mechanisms as to how rapsyn and NUP88 have an impact on cilia growth.

Taken together, our data presented here strongly support the notion that impaired ciliogenesis can underlay FADS and that this contributes to the pleiotropic clinical features that coincide with the disease, in particular to craniofacial and skeletal defects. Moreover, PC are required for proper myoblast differentiation (Fu et al., 2014), which suggests that also the muscular and movement defects seen in FADS individuals at least in part arise from impaired PC formation and growth.



03/09/19

## **Material and Methods**

All experiments were carried out at room temperature unless otherwise stated.

### ***Cell culture and transfection***

MRC5 (catalogue number AG05965-G), FADS (FADS 1; catalogue number GM11328), and HGPS (catalogue number AG 01972) fibroblasts were obtained from Coriell (Human Genetic Cell Repository; Coriell Institute, Hamden, NJ, USA). FADS 2 fibroblasts were from an individual harboring a homozygous c.484G>A (p.Glu162Lys) variant in the *RAPSN* gene (NM\_005055.4) as described previously (Winters et al., 2017). FADS 1 cells were grown in Minimum Essential Medium (MEM) Alpha (Lonza, Basel, Switzerland) supplemented with 15% fetal bovine serum (FBS) plus penicillin and streptomycin. HGPS cells were grown in MEM medium (Life Technologies Gibco, Gent, Belgium) supplemented with 15% FBS, non-essential amino acids plus penicillin/streptomycin. MRC5 and FADS 2 fibroblasts were grown in MEM medium supplemented with 10% FBS and penicillin/streptomycin. All cell lines were grown at 37°C in a humidified incubator with 5% CO<sub>2</sub> atmosphere.

Transfection with siRNAs was carried out using Lipofectamine RNAiMAX (Life Technologies Invitrogen) following the instructions of the manufacturer. siRNAs were from Dharmacon (Lafayette, CO, USA): *RAPSN* (L-006550-00), *MUSK* (L-03158-00), *NUP88* (L-017547-01-0005), and non-targeting siRNAs (D-001810-10).

### ***EdU cell proliferation assay***

For EdU incorporation, cells were plated on coverslips in a 24-well plate and grown to 70-80% confluency. Cells were next incubated for 1 h with medium

03/09/19

containing 10  $\mu$ M EdU, according to the manufacturer's instructions (Click-iT Edu Alexa Fluor 594 Imaging Kit, Invitrogen). After incubation, cells were fixed for 15 min in 3.7% formaldehyde, washed twice in PBS containing 2% bovine serum albumin (BSA), permeabilized with PBS containing 0.5% Triton X-100 for 20 min, and washed twice in PBS containing 2% BSA. Cells were next incubated for 30 min with Click-iT reaction solution according to the manufacturer's instructions, washed twice in PBS containing 2% BSA, washed two times in PBS. Coverslips were mounted with a drop of Mowiol-4088 (Sigma-Aldrich, St. Louis, MO, USA) containing DAPI (1  $\mu$ g/ml; Sigma-Aldrich) and stored at 4°C until viewed. Cells were imaged using a Zeiss Observer.Z1 microscope (Zeiss, Oberkochen, Germany). Images were recorded using the microscope system software and processed using Fiji/ImageJ (Version 1.52p; (Schindelin et al., 2012)). EdU positive cells were counted manually.

### *Senescence assays*

Cells were seeded in 6-well culture dishes at a density of  $0.4 \times 10^5$  cells/well 48 h prior to the experiment. Cellular senescence was analyzed using the Senescence  $\beta$ -Galactosidase Staining Kit (Cell Signaling Technology, Cambridge, UK) according to the protocol from the manufacturer. Development of the blue color in senescent cells while the  $\beta$ -galactosidase was still on the culture dishes was evaluated using a Zeiss Observer.Z1 microscope. Images were recorded using the microscope system software and processed using Adobe Photoshop (Version 12.0; Adobe Systems, Mountain View, CA, USA).  $\beta$ -galactosidase positive cells were counted manually. Analyses were performed in duplicate and the experiment was repeated at least three times.

03/09/19

### ***Microtubule assays***

In order to assess kinetochore-fiber microtubule stability, cells were either put on ice for 10 min or treated with 10  $\mu$ M (complete loss) or 170 nM (low polymerization) of nocodazole (Sigma-Aldrich). For microtubule repolymerization assays, cells were put on ice for 10 min and then incubated again in a 37 °C humidified 5 % CO<sub>2</sub> atmosphere for 0, 30 and 90 s.

Next, cells were fixed with 4% paraformaldehyde in PBS for 5 min, permeabilized with 0.5% Triton X-100 in PBS for 5 min and then fixed again. Blocking was performed with 2% BSA/0.1% Triton X-100 in PBS for 30 min. All antibodies were diluted in blocking solution. Primary antibodies were incubated at 4°C over-night in a humidified chamber. Secondary antibodies were incubated 1 h in the dark. Excess antibodies after primary and secondary antibody staining were removed by three washing steps using 0.1% Triton X-100 in PBS for 5 min. Cover slips were mounted onto microscope slides with Mowiol-4088 containing DAPI (1 $\mu$ g/ml). Cells were imaged using a Zeiss Observer.Z1 microscope. Images were recorded using the microscope system software and processed using Fiji/ImageJ and Adobe Photoshop. Analyses were performed in duplicate and the experiment was repeated at least three times.

### ***Doubling time***

Cells were seeded in 6-well culture plates at a density of  $0.4 \times 10^5$  cells/well. Cells were counted using a TC20TM Automated Cell Counter (Bio-Rad, California, USA) at indicated time points, over a range of at least 168 h. Only the linear parts of the count data were used in the analysis.

03/09/19

Growth curve analysis (GCA) and growth constant  $k$  (slope of linear regression line) and doubling time  $T_d$  calculation were calculated using the multilevel regression technique using the open-source R Studio (Version 1.2.1335; R version 3.6.0; R: A language and environment for statistical computing. R Foundation for Statistical Computing, Vienna, Austria. <https://www.R-project.org>) as described earlier (Mirman, 2014). By using GCA, both group-level and individual-level effects on cellular growth were analyzed. The linear model (m.1; Fig. 2A) suggests effects of the different cell lines on proliferation and the intercept model (m.0; Fig. S5B) suggests constant differences in proliferation randomly assigned to the different cell lines. Statistical comparison (Pearson's  $\chi^2$  test with two degrees of freedom of the models revealed that the linear regression model m.1 was used as regression model of choice ( $p < 0.001$ )). A third model for regression calculation was evaluated, which included unmeasured individual properties affecting cell growth, but this model did not improve the regression calculation (data not shown). Measurements were done in duplicate and experiments were repeated three times.

### ***Immunofluorescence***

Cells were grown on coverslips in 24-well plates and fixed either with 2% formaldehyde for 15 min or -20°C methanol (for  $\gamma$ -tubulin and centrin-3 staining) for 10 min, washed three times for 10 min with PBS, and permeabilized with PBS containing 1% BSA and 0.2% Triton X-100 for 10 min on ice. Next, the cells were washed three times for 10 min in PBS containing 2% BSA and incubated with the appropriate primary antibodies for 1 h at RT or over-night at 4°C, washed three times in PBS containing 1% BSA and incubated with the appropriate secondary antibodies for 1 hour, washed four times 10 min with PBS and mounted with a drop of Mowiol-

03/09/19

4088 containing DAPI. Cells were imaged using a Zeiss LSM-710 confocal laser-scanning microscope (Zeiss, Oberkochen, Germany). Images were recorded using the microscope system software and processed using Fiji/ImageJ and Adobe Photoshop.

The following antibodies were used as primary antibodies: monoclonal mouse anti-lamin A/C (1:30; ab40567; Abcam, Cambridge, UK), mouse anti- $\gamma$ -tubulin (1:1000; ab11316; Abcam), mouse anti- $\beta$ -tubulin (1:1000; clone KMX-1; Merck Millipore, Massachusetts, USA), mouse anti-acetylated  $\alpha$ -tubulin (1:1000; T7451; Sigma-Aldrich), mouse anti-DOK7 (1:50; NBP2-02073; Novus Biologicals, Abingdon, UK), mouse anti-NUP88 (1:500; 611896; BD Biosciences, San Jose, CA, USA), mouse anti-Ki67 (1:100; NCL-L-Ki67-MM1; Novocastra Laboratories, Newcastle upon Tyne, UK), and rat anti- $\alpha$ -tubulin (1:1000; MCA78G; Bio-Rad AbD Serotec). Polyclonal rabbit lamin B1 (1:300; ab16048; Abcam), rabbit anti- $\gamma$ -tubulin (1:100; Proteintech, Manchester, UK), rabbit anti-centrin-3 (1:1000; PA5-35865; Thermo Scientific, Rockford, USA), rabbit anti-acetylated  $\alpha$ -tubulin (1:800; 5335; Cell Signaling, Leiden, The Netherlands), rabbit anti-Arl13b (1:200; 17711-1-AP; Proteintech), rabbit anti-rapsyn (1:200; NBP1-85537; Novus Biologicals), rabbit anti-MuSK (1:100; PA5-14705; Thermo Scientific), and human anti-CREST (1:3; Antibodies Incorporated, California, USA).

Secondary antibodies were the corresponding goat anti-mouse IgG Alexa Fluor 568, goat anti-rabbit IgG Alexa Fluor 568, goat anti-mouse IgG Alexa Fluor 488, goat anti-rabbit IgG Alexa Fluor 488 and goat anti-human IgG Alexa Fluor 568. All secondary antibodies were diluted 1:1000 and purchased from Invitrogen.

### ***Western blotting***

03/09/19

Cells were lysed in lysis buffer (50 mM Tris-HCl, pH 7.8, 150 mM NaCl, 1% Nonidet-P40 and protease inhibitor cocktail tablets (Roche, Basel, Switzerland)). 30  $\mu$ g of protein were loaded and separated by sodium dodecyl sulfate-polyacrylamide gel electrophoresis (SDS-PAGE). The proteins were transferred onto a PVDF membrane (Immobilon-P, Merck Millipore) and the membranes were blocked with TBS containing 0.1% Tween 20 and 5% non-fat dry milk for 1 hour. The membranes were then incubated over-night at 4°C in blocking solution containing a primary antibody followed by washing 3x in TBS containing 0.1% Tween 20 and 5% non-fat dry. The membranes were next incubated with secondary antibodies for 1 hour, washed 3x in TBS containing 0.1% Tween 20 and developed. X-ray films were scanned and processed using Fiji/ImageJ.

The following antibodies were used as primary antibodies: monoclonal mouse anti-lamin A/C (1:200; ab8984, Abcam), mouse anti-NUP88 (1:1000), mouse anti-DOK7 (1:1000), mouse anti-CRM1 1:1000, and mouse anti- $\beta$ -tubulin (1:1000). Polyclonal rabbit anti-lamin B1 (1:300), rabbit anti-rapsyn (1:500), rabbit anti-MuSK (1:1000), rabbit anti-actin (1:1000; A2066, Sigma-Aldrich), rabbit anti-acetylated  $\alpha$ -tubulin (1:1000), rabbit anti-detyrosinated  $\alpha$ -tubulin (1:1000), and rabbit anti- $\alpha$ -tubulin (1:4000; ab18251; Abcam).

Secondary antibodies were either alkaline phosphatase-coupled IgG antibodies (1:10.000) from Sigma/Aldrich or horseradish peroxidase-coupled IgG antibodies (1:8000) from Cell Signaling Technology.

### ***Proximity ligation assay***

Cells grown on glass cover slips were fixed with 4% PFA in PBS for 5 min or fixed at -20°C with methanol (for  $\gamma$ -tubulin) for 10 min, permeabilized with 0.5%

03/09/19

Triton-X-100 in PBS for 5 min and then fixed again. Blocking was performed with 2% BSA/0.1% Triton-X-100 in PBS for 30 min at RT.

All antibodies used for proximity ligation assay (PLA) were diluted in blocking solution. Antibodies rabbit anti-rapsyn, rat anti- $\alpha$ -tubulin, mouse anti- $\beta$ -tubulin, rabbit anti- $\gamma$ -tubulin, mouse anti-NUP88, and rabbit anti-NUP88 (kind gift from Dr. Ulrike Kutay, ETH Zurich, Switzerland) were incubated at 4°C over-night in a humidified chamber. Excess antibodies were removed by three washing steps using 0.1% Triton X-100 in PBS for 5 min. PLA was performed using Duolink® PLA Fluorescent Detection (red) with anti-mouse PLUS and anti-rabbit MINUS oligonucleotides (Sigma-Aldrich). PLA was performed as described elsewhere (Lin et al., 2015). Wash buffers were prepared as follows: wash buffer A (0.01 M Tris, pH 7.4, 0.15 M NaCl, 0.05% Tween 20) and wash buffer B (0.2 M Tris, pH 7.5, 0.1 M NaCl). Cover slips were mounted onto microscope slides with Mowiol-4088 containing DAPI. Cells were imaged using a Zeiss Observer.Z1 microscope. Images were recorded using the microscope system software and processed using Fiji/ImageJ and Adobe Photoshop. Analyses were performed in duplicate and the experiment was repeated at least three times. PLA foci were counted using a macro written on Fiji/ImageJ: briefly, parameters and scale were set, images thresholded (Median, Gaussian blur, MaxEntropy) and particles (PLA foci) counted.

### ***Statistical analyses***

All plots and statistics (despite GCM models) were generated using GraphPad Prism (Version 8; GraphPad Software Inc., CA, USA) or Apple Numbers (Apple Inc., CA, USA). Two-tailed t-test was performed. During evaluation of the results a confidence

03/09/19

interval  $\alpha$  of 95% and p values lower than 0.05 were considered as statistically significant.

### ***Image design***

Schematic representations were designed using the open-source software Inkscape 0.91 (by running XQuartz 2.7.11 on macOS). Colors were adapted from <http://www.ColorBrewer.org> by Cynthia A. Brewer (Brewer).



03/09/19

## **Acknowledgements**

We are grateful to Dr. Ulrike Kutay (ETH Zürich, Switzerland) for sharing reagents. Confocal images were acquired at the CMMI, which is supported by the European Regional Development Fund (ERDF).

This work was supported by grants from the Fédération Wallonie-Bruxelles (ARC 4.110.F.000092F).

03/09/19

## References

- Aguilar, A., L. Becker, T. Tedeschi, S. Heller, C. Iomini, and M.V. Nachury. 2014. Alpha-tubulin K40 acetylation is required for contact inhibition of proliferation and cell-substrate adhesion. *Mol Biol Cell*. 25:1854-1866.
- Aittaleb, M., P.J. Chen, and M. Akaaboune. 2015. Failure of lysosome clustering and positioning in the juxtannuclear region in cells deficient in rapsyn. *J Cell Sci*. 128:3744-3756.
- Antolik, C., D.H. Catino, A.M. O'Neill, W.G. Resneck, J.A. Ursitti, and R.J. Bloch. 2007. The actin binding domain of ACF7 binds directly to the tetratricopeptide repeat domains of rapsyn. *Neuroscience*. 145:56-65.
- Attali, R., N. Warwar, A. Israel, I. Gurt, E. McNally, M. Puckelwartz, B. Glick, Y. Nevo, Z. Ben-Neriah, and J. Melki. 2009. Mutation of SYNE-1, encoding an essential component of the nuclear lamina, is responsible for autosomal recessive arthrogryposis. *Hum Mol Genet*. 18:3462-3469.
- Avalos, Y., D. Pena-Oyarzun, M. Budini, E. Morselli, and A. Criollo. 2017. New Roles of the Primary Cilium in Autophagy. *Biomed Res Int*. 2017:4367019.
- Bao, X.X., C. Spanos, T. Kojidani, E.M. Lynch, J. Rappsilber, Y. Hiraoka, T. Haraguchi, and K.E. Sawin. 2018. Exportin Crm1 is repurposed as a docking protein to generate microtubule organizing centers at the nuclear pore. *Elife*. 7.
- Bartoli, M., M.K. Ramarao, and J.B. Cohen. 2001. Interactions of the rapsyn RING-H2 domain with dystroglycan. *J Biol Chem*. 276:24911-24917.
- Beecroft, S.J., M. Lombard, D. Mowat, C. McLean, A. Cairns, M. Davis, N.G. Laing, and G. Ravenscroft. 2018. Genetics of neuromuscular fetal akinesia in the genomics era. *Journal of medical genetics*. 55:505-514.
- Bernad, R., D. Engelsma, H. Sanderson, H. Pickersgill, and M. Fornerod. 2006. Nup214-Nup88 nucleoporin subcomplex is required for CRM1-mediated 60 S preribosomal nuclear export. *J Biol Chem*. 281:19378-19386.
- Bettencourt-Dias, M., F. Hildebrandt, D. Pellman, G. Woods, and S.A. Godinho. 2011. Centrosomes and cilia in human disease. *Trends Genet*. 27:307-315.
- Blacque, O.E., M.J. Reardon, C. Li, J. McCarthy, M.R. Mahjoub, S.J. Ansley, J.L. Badano, A.K. Mah, P.L. Beales, W.S. Davidson, R.C. Johnsen, M. Audeh, R.H. Plasterk, D.L. Baillie, N. Katsanis, L.M. Quarmby, S.R. Wicks, and M.R. Leroux. 2004. Loss of *C. elegans* BBS-7 and BBS-8 protein function results in cilia defects and compromised intraflagellar transport. *Genes Dev*. 18:1630-1642.
- Boldt, K., J. van Reeuwijk, Q. Lu, K. Koutroumpas, T.M. Nguyen, Y. Texier, S.E. van Beersum, N. Horn, J.R. Willer, D.A. Mans, G. Dougherty, I.J. Lamers, K.L. Coene, H.H. Arts, M.J. Betts, T. Beyer, E. Bolat, C.J. Gloeckner, K. Haidari, L. Hetterschijt, D. Iaconis, D. Jenkins, F. Klose, B. Knapp, B. Latour, S.J. Letteboer, C.L. Marcelis, D. Mitic, M. Morleo, M.M. Oud, M. Riemersma, S. Rix, P.A. Terhal, G. Toedt, T.J. van Dam, E. de Vrieze, Y. Wissinger, K.M. Wu, G. Apic, P.L. Beales, O.E. Blacque, T.J. Gibson, M.A. Huynen, N. Katsanis, H. Kremer, H. Omran, E. van Wijk, U. Wolfrum, F. Kepes, E.E. Davis, B. Franco, R.H. Giles, M. Ueffing, R.B. Russell, R. Roepman, and U.K.R.D. Group. 2016. An organelle-specific protein landscape identifies novel diseases and molecular mechanisms. *Nat Commun*. 7:11491.
- Bonnin, E., P. Cabochette, A. Filosa, R. Juhlen, S. Komatsuzaki, M. Hezwani, A. Dickmanns, V. Martinelli, M. Vermeersch, L. Supply, N. Martins, L. Pirenne, G. Ravenscroft, M. Lombard, S. Port, C. Spillner, S. Janssens, E. Roets, J.

03/09/19

- Van Dorpe, M. Lammens, R.H. Kehlenbach, R. Ficner, N.G. Laing, K. Hoffmann, B. Vanhollebeke, and B. Fahrenkrog. 2018. Biallelic mutations in nucleoporin NUP88 cause lethal fetal akinesia deformation sequence. *PLoS Genet.* 14:e1007845.
- Bredrup, C., S. Saunier, M.M. Oud, T. Fiskerstrand, A. Hoischen, D. Brackman, S.M. Leh, M. Midtbo, E. Filhol, C. Bole-Feysot, P. Nitschke, C. Gilissen, O.H. Haugen, J.S. Sanders, I. Stolte-Dijkstra, D.A. Mans, E.J. Steenbergen, B.C. Hamel, M. Maignon, R. Pfundt, C. Jeanpierre, H. Boman, E. Rodahl, J.A. Veltman, P.M. Knappskog, N.V. Knoers, R. Roepman, and H.H. Arts. 2011. Ciliopathies with skeletal anomalies and renal insufficiency due to mutations in the IFT-A gene WDR19. *American journal of human genetics.* 89:634-643.
- Buck, S.B., J. Bradford, K.R. Gee, B.J. Agnew, S.T. Clarke, and A. Salic. 2008. Detection of S-phase cell cycle progression using 5-ethynyl-2'-deoxyuridine incorporation with click chemistry, an alternative to using 5-bromo-2'-deoxyuridine antibodies. *Biotechniques.* 44:927-929.
- Burden, S.J. 2002. Building the vertebrate neuromuscular synapse. *J Neurobiol.* 53:501-511.
- Burden, S.J., M.G. Huijbers, and L. Remedio. 2018. Fundamental Molecules and Mechanisms for Forming and Maintaining Neuromuscular Synapses. *Int J Mol Sci.* 19.
- Chavali, P.L., M. Putz, and F. Gergely. 2014. Small organelle, big responsibility: the role of centrosomes in development and disease. *Philos Trans R Soc Lond B Biol Sci.* 369.
- Dobbins, G.C., S. Luo, Z. Yang, W.C. Xiong, and L. Mei. 2008. alpha-Actinin interacts with rapsyn in agrin-stimulated AChR clustering. *Mol Brain.* 1:18.
- Eguether, T., J.T. San Agustin, B.T. Keady, J.A. Jonassen, Y. Liang, R. Francis, K. Tobita, C.A. Johnson, Z.A. Abdelhamed, C.W. Lo, and G.J. Pazour. 2014. IFT27 links the BBSome to IFT for maintenance of the ciliary signaling compartment. *Dev Cell.* 31:279-290.
- Engel, A.G. 2012. Current status of the congenital myasthenic syndromes. *Neuromuscul Disord.* 22:99-111.
- Frail, D.E., L.S. Musil, A. Buonanno, and J.P. Merlie. 1989. Expression of RAPsyn (43K protein) and nicotinic acetylcholine receptor genes is not coordinately regulated in mouse muscle. *Neuron.* 2:1077-1086.
- Fu, W., P. Asp, B. Canter, and B.D. Dynlacht. 2014. Primary cilia control hedgehog signaling during muscle differentiation and are deregulated in rhabdomyosarcoma. *Proc Natl Acad Sci U S A.* 111:9151-9156.
- Gadadhar, S., H. Dadi, S. Bodakuntla, A. Schnitzler, I. Bieche, F. Rusconi, and C. Janke. 2017. Tubulin glycylation controls primary cilia length. *J Cell Biol.* 216:2701-2713.
- Galati, D.F., K.D. Sullivan, A.T. Pham, J.M. Espinosa, and C.G. Pearson. 2018. Trisomy 21 Represses Cilia Formation and Function. *Dev Cell.* 46:641-650 e646.
- Garcia, G., 3rd, D.R. Raleigh, and J.F. Reiter. 2018. How the Ciliary Membrane Is Organized Inside-Out to Communicate Outside-In. *Curr Biol.* 28:R421-R434.
- Gerdes, J., H. Lemke, H. Baisch, H.H. Wacker, U. Schwab, and H. Stein. 1984. Cell cycle analysis of a cell proliferation-associated human nuclear antigen defined by the monoclonal antibody Ki-67. *J Immunol.* 133:1710-1715.
- Ghasemizadeh, A., E. Christin, A. Guiraud, N. Couturier, V. Risson, E. Girard, C. Jagla, C. Soler, L. Laddada, C. Sanchez, F. Jaque, A. Garcia, M. Lanfranchi,

03/09/19

- V. Jacquemond, J. Gondin, J. Courchet, L. Schaeffer, and V. Gache. 2019. Skeletal muscle MACF1 maintains myonuclei and mitochondria localization through microtubules to control muscle functionalities. *bioRxiv* 636464:doi: <https://doi.org/10.1101/636464>.
- Ghazanfari, N., K.J. Fernandez, Y. Murata, M. Morsch, S.T. Ngo, S.W. Reddel, P.G. Noakes, and W.D. Phillips. 2011. Muscle specific kinase: organiser of synaptic membrane domains. *Int J Biochem Cell Biol.* 43:295-298.
- Gupta, G.D., E. Coyaud, J. Goncalves, B.A. Mojarad, Y. Liu, Q. Wu, L. Gheiratmand, D. Comartin, J.M. Tkach, S.W. Cheung, M. Bashkurov, M. Hasegan, J.D. Knight, Z.Y. Lin, M. Schueler, F. Hildebrandt, J. Moffat, A.C. Gingras, B. Raught, and L. Pelletier. 2015. A Dynamic Protein Interaction Landscape of the Human Centrosome-Cilium Interface. *Cell.* 163:1484-1499.
- Hall, J.G. 2009. Pena-Shokeir phenotype (fetal akinesia deformation sequence) revisited. *Birth defects research. Part A, Clinical and molecular teratology.* 85:677-694.
- Huang, S., and P. Avasthi. 2019. RanGTP regulates cilium formation and ciliary trafficking of a kinesin-II subunit independent of its nuclear functions. *bioRxiv* 562272:doi: <https://doi.org/10.1101/562272>.
- Hutten, S., and R.H. Kehlenbach. 2006. Nup214 is required for CRM1-dependent nuclear protein export in vivo. *Mol Cell Biol.* 26:6772-6785.
- Jao, L.E., A. Akef, and S.R. Wentz. 2017. A role for Gle1, a regulator of DEAD-box RNA helicases, at centrosomes and basal bodies. *Mol Biol Cell.* 28:120-127.
- Johnson, C.A., and J.J. Malicki. 2019. The Nuclear Arsenal of Cilia. *Dev Cell.* 49:161-170.
- Johnson, K.A. 1998. The axonemal microtubules of the *Chlamydomonas* flagellum differ in tubulin isoform content. *J Cell Sci.* 111 ( Pt 3):313-320.
- Kee, H.L., J.F. Dishinger, T.L. Blasius, C.J. Liu, B. Margolis, and K.J. Verhey. 2012. A size-exclusion permeability barrier and nucleoporins characterize a ciliary pore complex that regulates transport into cilia. *Nat Cell Biol.* 14:431-437.
- Keeling, J., L. Tsiokas, and D. Maskey. 2016. Cellular Mechanisms of Ciliary Length Control. *Cells.* 5.
- Kim, N., and S.J. Burden. 2008. MuSK controls where motor axons grow and form synapses. *Nat Neurosci.* 11:19-27.
- Kim, N., A.L. Stiegler, T.O. Cameron, P.T. Hallock, A.M. Gomez, J.H. Huang, S.R. Hubbard, M.L. Dustin, and S.J. Burden. 2008. Lrp4 is a receptor for Agrin and forms a complex with MuSK. *Cell.* 135:334-342.
- Leung, C.L., D. Sun, M. Zheng, D.R. Knowles, and R.K. Liem. 1999. Microtubule actin cross-linking factor (MACF): a hybrid of dystonin and dystrophin that can interact with the actin and microtubule cytoskeletons. *J Cell Biol.* 147:1275-1286.
- Li, L., Y. Cao, H. Wu, X. Ye, Z. Zhu, G. Xing, C. Shen, A. Barik, B. Zhang, X. Xie, W. Zhi, L. Gan, H. Su, W.C. Xiong, and L. Mei. 2016. Enzymatic Activity of the Scaffold Protein Rapsyn for Synapse Formation. *Neuron.* 92:1007-1019.
- Lin, M.Z., J.L. Martin, and R.C. Baxter. 2015. Proximity Ligation Assay (PLA) to Detect Protein-protein Interactions in Breast Cancer Cells. *Bio-protocol.* 5:e1479.
- Luiskandl, S., B. Woller, M. Schlauf, J.A. Schmid, and R. Herbst. 2013. Endosomal trafficking of the receptor tyrosine kinase MuSK proceeds via clathrin-dependent pathways, Arf6 and actin. *FEBS J.* 280:3281-3297.

03/09/19

- Luo, W., A. Ruba, D. Takao, L.P. Zweifel, R.Y.H. Lim, K.J. Verhey, and W. Yang. 2017. Axonemal Lumen Dominates Cytosolic Protein Diffusion inside the Primary Cilium. *Sci Rep.* 7:15793.
- Magiera, M.M., P. Singh, S. Gadadhar, and C. Janke. 2018. Tubulin Posttranslational Modifications and Emerging Links to Human Disease. *Cell.* 173:1323-1327.
- Marchand, S., F. Bignami, F. Stetzkowski-Marden, and J. Cartaud. 2000. The myristoylated protein rapsyn is cotargeted with the nicotinic acetylcholine receptor to the postsynaptic membrane via the exocytic pathway. *J Neurosci.* 20:521-528.
- Marchand, S., A. Devillers-Thierry, S. Pons, J.P. Changeux, and J. Cartaud. 2002. Rapsyn escorts the nicotinic acetylcholine receptor along the exocytic pathway via association with lipid rafts. *J Neurosci.* 22:8891-8901.
- Mazhar, S., and R. Herbst. 2012. The formation of complex acetylcholine receptor clusters requires MuSK kinase activity and structural information from the MuSK extracellular domain. *Mol Cell Neurosci.* 49:475-486.
- Michalk, A., S. Stricker, J. Becker, R. Rupps, T. Pantzar, J. Miertus, G. Botta, V.G. Naretto, C. Janetzki, N. Yaqoob, C.E. Ott, D. Seelow, D. Wiczorek, B. Fiebig, B. Wirth, M. Hoopmann, M. Walther, F. Korber, M. Blankenburg, S. Mundlos, R. Heller, and K. Hoffmann. 2008. Acetylcholine receptor pathway mutations explain various fetal akinesia deformation sequence disorders. *American journal of human genetics.* 82:464-476.
- Mihailovska, E., M. Raith, R.G. Valencia, I. Fischer, M. Al Banchaabouchi, R. Herbst, and G. Wiche. 2014. Neuromuscular synapse integrity requires linkage of acetylcholine receptors to postsynaptic intermediate filament networks via rapsyn-plectin 1f complexes. *Mol Biol Cell.* 25:4130-4149.
- Mirman, D. 2014. Growth curve analysis and visualization using R. Chapman and Hall/CRC, New York. 188 pp.
- Mirvis, M., T. Stearns, and W. James Nelson. 2018. Cilium structure, assembly, and disassembly regulated by the cytoskeleton. *Biochem J.* 475:2329-2353.
- Moransard, M., L.S. Borges, R. Willmann, P.A. Marangi, H.R. Brenner, M.J. Ferns, and C. Fuhrer. 2003. Agrin regulates rapsyn interaction with surface acetylcholine receptors, and this underlies cytoskeletal anchoring and clustering. *J Biol Chem.* 278:7350-7359.
- Musil, L.S., D.E. Frail, and J.P. Merlie. 1989. The mammalian 43-kD acetylcholine receptor-associated protein (RAPsyn) is expressed in some nonmuscle cells. *J Cell Biol.* 108:1833-1840.
- Okada, K., A. Inoue, M. Okada, Y. Murata, S. Kakuta, T. Jigami, S. Kubo, H. Shiraishi, K. Eguchi, M. Motomura, T. Akiyama, Y. Iwakura, O. Higuchi, and Y. Yamanashi. 2006. The muscle protein Dok-7 is essential for neuromuscular synaptogenesis. *Science.* 312:1802-1805.
- Ou, G., M. Koga, O.E. Blacque, T. Murayama, Y. Ohshima, J.C. Schafer, C. Li, B.K. Yoder, M.R. Leroux, and J.M. Scholey. 2007. Sensory ciliogenesis in *Caenorhabditis elegans*: assignment of IFT components into distinct modules based on transport and phenotypic profiles. *Mol Biol Cell.* 18:1554-1569.
- Oury, J., Y. Liu, A. Topf, S. Todorovic, E. Hoedt, V. Preethish-Kumar, T.A. Neubert, W. Lin, H. Lochmuller, and S.J. Burden. 2019. MACF1 links Rapsyn to microtubule- and actin-binding proteins to maintain neuromuscular synapses. *J Cell Biol.* 218:1686-1705.
- Petry, S., and R.D. Vale. 2015. Microtubule nucleation at the centrosome and beyond. *Nat Cell Biol.* 17:1089-1093.

03/09/19

- Potter, C., D. Razafsky, D. Wozniak, M. Casey, S. Penrose, X. Ge, M.R. Mahjoub, and D. Hodzic. 2018. The KASH-containing isoform of Nesprin1 giant associates with ciliary rootlets of ependymal cells. *Neurobiol Dis.* 115:82-91.
- Potter, C., W. Zhu, D. Razafsky, P. Ruzycski, A.V. Kolesnikov, T. Doggett, V.J. Kefalov, E. Betleja, M.R. Mahjoub, and D. Hodzic. 2017. Multiple Isoforms of Nesprin1 Are Integral Components of Ciliary Rootlets. *Curr Biol.* 27:2014-2022 e2016.
- Ravenscroft, G., E. Sollis, A.K. Charles, K.N. North, G. Baynam, and N.G. Laing. 2011. Fetal akinesia: review of the genetics of the neuromuscular causes. *Journal of medical genetics.* 48:793-801.
- Reiter, J.F., and M.R. Leroux. 2017. Genes and molecular pathways underpinning ciliopathies. *Nat Rev Mol Cell Biol.* 18:533-547.
- Rosenbaum, J.L., and G.B. Witman. 2002. Intraflagellar transport. *Nat Rev Mol Cell Biol.* 3:813-825.
- Ruba, A., W. Luo, J. Yu, D. Takao, A. Evangelou, R. Higgins, S. Khim, K.J. Verhey, and W. Yang. 2019. The Ciliary Lumen Accommodates Passive Diffusion and Vesicle Trafficking in Cytoplasmic-Ciliary Transport. *bioRxiv* 704213;doi: <https://doi.org/10.1101/704213>.
- Schou, K.B., L.B. Pedersen, and S.T. Christensen. 2015. Ins and outs of GPCR signaling in primary cilia. *EMBO Rep.* 16:1099-1113.
- Sharma, N., Z.A. Kosan, J.E. Stallworth, N.F. Berbari, and B.K. Yoder. 2011. Soluble levels of cytosolic tubulin regulate ciliary length control. *Mol Biol Cell.* 22:806-816.
- Shida, T., J.G. Cueva, Z. Xu, M.B. Goodman, and M.V. Nachury. 2010. The major alpha-tubulin K40 acetyltransferase alphaTAT1 promotes rapid ciliogenesis and efficient mechanosensation. *Proc Natl Acad Sci U S A.* 107:21517-21522.
- Silva, M., N. Morsci, K.C.Q. Nguyen, A. Rizvi, C. Rongo, D.H. Hall, and M.M. Barr. 2017. Cell-Specific alpha-Tubulin Isoform Regulates Ciliary Microtubule Ultrastructure, Intraflagellar Transport, and Extracellular Vesicle Biology. *Curr Biol.* 27:968-980.
- Sirajuddin, M., L.M. Rice, and R.D. Vale. 2014. Regulation of microtubule motors by tubulin isotypes and post-translational modifications. *Nat Cell Biol.* 16:335-344.
- Takao, D., L. Wang, A. Boss, and K.J. Verhey. 2017. Protein Interaction Analysis Provides a Map of the Spatial and Temporal Organization of the Ciliary Gating Zone. *Curr Biol.* 27:2296-2306 e2293.
- Tan-Sindhunata, M.B., I.B. Mathijssen, M. Smit, F. Baas, J.I. de Vries, J.P. van der Voorn, I. Kluijt, M.A. Hagen, E.W. Blom, E. Sistermans, H. Meijers-Heijboer, Q. Waisfisz, M.M. Weiss, and A.J. Groffen. 2015. Identification of a Dutch founder mutation in MUSK causing fetal akinesia deformation sequence. *European journal of human genetics : EJHG.* 23:1151-1157.
- Verhey, K.J., and J. Gaertig. 2007. The tubulin code. *Cell Cycle.* 6:2152-2160.
- Vogt, J., B.J. Harrison, H. Spearman, J. Cossins, S. Vermeer, L.N. ten Cate, N.V. Morgan, D. Beeson, and E.R. Maher. 2008. Mutation analysis of CHRNA1, CHRN1, CHRND, and RAPSN genes in multiple pterygium syndrome/fetal akinesia patients. *American journal of human genetics.* 82:222-227.
- Vogt, J., N.V. Morgan, T. Marton, S. Maxwell, B.J. Harrison, D. Beeson, and E.R. Maher. 2009. Germline mutation in DOK7 associated with fetal akinesia deformation sequence. *Journal of medical genetics.* 46:338-340.

03/09/19

- Wang, L., and B.D. Dynlacht. 2018. The regulation of cilium assembly and disassembly in development and disease. *Development*. 145.
- Wilbe, M., S. Ekvall, K. Eurenus, K. Ericson, O. Casar-Borota, J. Klar, N. Dahl, A. Ameer, G. Anneren, and M.L. Bondeson. 2015. MuSK: a new target for lethal fetal akinesia deformation sequence (FADS). *Journal of medical genetics*. 52:195-202.
- Winters, L., E. Van Hoof, L. De Catte, K. Van Den Bogaert, T. de Ravel, L. De Waele, A. Corveleyn, and J. Breckpot. 2017. Massive parallel sequencing identifies RAPSN and PDHA1 mutations causing fetal akinesia deformation sequence. *Eur J Paediatr Neurol*. 21:745-753.
- Wloga, D., E. Joachimiak, P. Louka, and J. Gaertig. 2017. Posttranslational Modifications of Tubulin and Cilia. *Cold Spring Harb Perspect Biol*. 9.
- Wu, H., W.C. Xiong, and L. Mei. 2010. To build a synapse: signaling pathways in neuromuscular junction assembly. *Development*. 137:1017-1033.
- Zhang, B., S. Luo, Q. Wang, T. Suzuki, W.C. Xiong, and L. Mei. 2008. LRP4 serves as a coreceptor of agrin. *Neuron*. 60:285-297.
- Zhang, W., A.S. Coldefy, S.R. Hubbard, and S.J. Burden. 2011. Agrin binds to the N-terminal region of Lrp4 protein and stimulates association between Lrp4 and the first immunoglobulin-like domain in muscle-specific kinase (MuSK). *J Biol Chem*. 286:40624-40630.

03/09/19

## Figure legends

**Figure 1:** Cultured fibroblasts from FADS individuals showed changes in nuclear morphology. Confocal sections of cultured fibroblasts from a healthy control fetus (MRC5), two FADS individuals, and a Hutchison Gilford progeria syndrome (HGPS) patient were stained for (A) lamin A/C (LA/C) and (B) lamin B1 (LB1). DNA was visualized with DAPI. Scale bars, 5  $\mu$ m. (C) Western blot analysis of LA/C and LB1 expression levels from cultured control and FADS fibroblasts. Actin was used as loading control.

**Figure 2:** FADS fibroblasts exhibit a decreased proliferative state. (A) Equal cell numbers were seeded 24 h before measurement and cell numbers were determined at the indicated time points. Growth curve analysis and growth constant k (slope of regression curve) calculation was done using multilevel regression technique using R Studio. Data points show the mean at the indicated time point and the point range shows the SEM. Growth constants k (slope of linear regression line) are decreased in both FADS cell lines compared to control MRC5 cells. P-values < 0.001. (B) The proliferative state of the indicated fibroblast cell line was determined by immunofluorescence microscopy and anti-Ki-67 staining. The proliferative state of FADS 1, but not FADS 2 cells, is reduced as compared to MRC5 control cells. (C) EdU incorporation and microscopic analysis revealed that the respective proliferation rate of both FADS 1 and FADS 2 cells was significantly lower than of MRC5 cells. (D) Cellular senescence was evaluated by  $\beta$ -galactosidase staining in FADS and MRC5 fibroblasts. Data present the mean  $\pm$ SD of at least three independent experiments. Total number of analyzed cells is indicated at the bottom of each bar. P-values \*\*\*\*<0.0001, \*\*\*<0.001, t-test, two-tailed.



03/09/19

**Figure 3:** FADS fibroblasts exhibit centrosome abnormalities. **(A)** Anti- $\beta$ -tubulin immunofluorescence of MRC5 and FADS fibroblasts during microtubule regrowth at 37°C after cold shock-induced microtubule depolymerization at 0°C. FADS cells show acentrosomal microtubule polymerization and altered microtubule growth speed. Inverted images of fluorescence signals are shown. **(B)** Abnormal centrosome number and distance in FADS 1 and FADS 2 fibroblasts as compared to MRC5 cells. Cells were stained with anti- $\gamma$ -tubulin antibodies (green). DNA was stained with DAPI (blue). Shown are representative confocal images. Quantitative analysis of **(C)** centrosome number represented as bar plots and **(D)** their distance to the nucleus represented as scatter plots in the indicated fibroblast cell lines. Measurements were done using Fiji/ImageJ. Data present the mean  $\pm$ SD of at least three independent experiments. The total number of analyzed cells were as indicated. **(E)** Centriole number FADS 1 and FADS 2 as in MRC5 fibroblasts. Cells were stained with anti-centrin-3 antibodies (green). DNA was stained with DAPI (blue). Shown are representative confocal images. Scale bars, 5  $\mu$ m.

**Figure 4:** Ciliogenesis is impaired in FADS fibroblasts. Representative confocal images of **(A)** anti-acetylated  $\alpha$ -tubulin and **(B)** anti-Arl13b staining in MRC5, FADS1, and FADS2 fibroblasts alongside with quantification of primary cilia (PC) length and percentage of ciliated cells are shown. Fibroblasts were subjected to serum-starvation 48 h before fixation and staining. PC number was counted manually and PC length was measured using Fiji/ImageJ. Data present the mean  $\pm$ SD of at least three independent experiments. Total number of analyzed cells is indicated at the

03/09/19

bottom of each bar. P-values \*\*\*\*<0.0001, \*<0.05, t-test, two-tailed. Scale bars, 10  $\mu$ m. Cellular lysates from (C) growing and (D) serum-starved fibroblasts were subjected to Western blot analysis using antibodies against acetylated (ac-)  $\alpha$ -tubulin, detyrosinated (detyr)  $\alpha$ -tubulin,  $\alpha$ -tubulin,  $\beta$ -tubulin. Anti-CRM1 antibodies were used as loading control. (E) Relative intensity of acetylated  $\alpha$ -tubulin (ac-tub), detyrosinated  $\alpha$ -tubulin (detyr-tub),  $\alpha$ -tubulin,  $\beta$ -tubulin levels in growing and in starved fibroblasts as determined by densitometry from three independent experiments using Fiji/ImageJ software.

**Figure 5:** FADS related proteins are critical for ciliogenesis. (A) Effects of control (siNT), rapsyn (siRapsyn) or NUP88 (siNUP88) depletion in MRC5 cells subjected 48 h to serum starvation and ciliogenesis. Representative confocal images of cilia marker acetylated  $\alpha$ -tubulin (ac-tub; green) and Arl13b (green) and DNA (blue) are shown. The respective quantification of primary cilia (PC) length are shown in (B; acetylated  $\alpha$ -tubulin) and (C; Arl13b). Measurements were done using using Fiji/ImageJ. Data present the mean  $\pm$ SD of at least three independent experiments. Total number of analyzed cells is indicated at the bottom of each bar. P-values \*\*\*\*<0.0001, t-test, two-tailed. Scale bars, 10  $\mu$ m.

**Figure 6:** Localization of rapsyn and NUP88 at centrosomes and primary cilia. (A) MRC5 and FADS cells were immunostained with anti-rapsyn antibodies (green) to reveal its intracellular localization in fibroblasts. (B) MRC5 and RH30 cells were labeled with anti-rapsyn (red) or anti-NUP88 antibodies (red), and co-immunostained with anti- $\gamma$ -tubulin antibodies (green). (C) Rapsyn (in red) and (D) NUP88 (in red) localize to the primary cilium in sub-confluent MRC5, FADS1, and FADS 2

03/09/19

fibroblasts that were serum starved for 48 h. Cilia were visualized by anti-acetylated  $\alpha$ -tubulin staining (ac-tub; green). DNA was visualized by DAPI. Rapsyn is located at the cilia base, whereas NUP88 localized along the axoneme of the PC. Shown are representative confocal images. Arrows depict the distinct localization of the proteins. Scale bars, 10  $\mu$ m.

**Figure 7:** MRC5, FADS 1 and FADS 2 fibroblasts were subjected to proximity ligation assays. **(A)** The close proximity ( $\sim$ 40 nm) between rapsyn and  $\alpha$ -tubulin,  $\beta$ -tubulin,  $\gamma$ -tubulin or NUP88 was visualized by PLA foci (red). DNA was stained with DAPI (blue). **(B)** Quantification of PLA foci/cell between rapsyn and designated proteins using Fiji/ImageJ. **(C)** The close proximity between NUP88 and  $\alpha$ -tubulin,  $\beta$ -tubulin or  $\gamma$ -tubulin was visualized by PLA foci (red). DNA was stained with DAPI (blue). **(D)** Quantification of PLA foci/cell between NUP88 and designated proteins using Fiji/ImageJ.

**Figure 8:** Schematic representations summarizing the association of rapsyn and NUP88 with microtubules and primary cilia in control and FADS cells. **(A)** Summary of PLA results in MRC5, FADS 1 and FADS 2 cells (Figure 7). Decreased positive PLA signals are marked either with --- or with a cross (for association between rapsyn and NUP88). The close localization of rapsyn with NUP88 is abolished in both FADS cell lines. In FADS 2, likely due to the displacement of rapsyn from to  $\alpha$ - and  $\beta$ -tubulin. In FADS 1, rapsyn and NUP88 localization close to  $\alpha$ -tubulin is increased. However, a mutation (i.e. the unknown disease causing mutation) in an unknown partner abolished the closeness of rapsyn and NUP88. **(B)** Possible mechanisms leading to impaired ciliogenesis in FADS.

03/09/19

03/09/19

### Supplementary figures

**Figure S1:** Mitotic FADS cells present with abnormal sloppy microtubule spindles, but spindle stability is not affected upon nocodazole treatment. **(A)** MRC5 and FADS 1 fibroblasts were cold-treated and mitotic cells stained for  $\beta$ -tubulin (green), CREST to visualize centromeres (red) and DAPI (blue). **(B)** MRC5 and FADS 1 fibroblasts were treated with high (10  $\mu$ M) or low (170 nM) concentrations of nocodazole and mitotic cells stained for  $\beta$ -tubulin (green), CREST to visualize centromeres (red) and DAPI (blue). Arrows mark sites of GOLGI mini stacks.

**Figure S2:** FADS affects cilia growth, but not cilia resorption. **(A)** Cilia resorption after release from 48 h serum starvation was comparable in MRC5 and FADS fibroblasts. PC, primary cilia. **(B)** Laminopathies do not coincide with ciliary defects. **(C)** Representative confocal images of anti-acetylated  $\alpha$ -tubulin (red) and anti-detyrosinated  $\alpha$ -tubulin (red) staining in serum starved MRC5, FADS1, and FADS2 fibroblasts grown on cross-bow micropattern. Actin (green) was visualized by phalloidin-Alexa Fluor 488 and DNA (blue) by DAPI staining.

Atyp progeria, atypical progeria; EDMD, Emery Dreifuss muscular dystrophy; FPLD, Familial partial lipodystrophy; HGPS, Hutchison Gilford progeria syndrome.

**Figure S3:** **(A)** MuSK-depleted MRC5 fibroblasts exhibit shorter PCs. MRC5 cells were transfected with a siRNA against MuSK and cells were serum starved for 48 h, fixed, and stained for acetylated  $\alpha$ -tubulin (ac-tubulin) (green) and Arl13b (green). Scale bars, 5  $\mu$ m. **(B)** MRC5 cells were transfected with the indicated siRNAs and the protein levels of MuSK, rapsyn and NUP88 were determined by Western blot analysis

03/09/19

and (C-E) quantified using Fiji/ImageJ. Data present the mean  $\pm$ SD of at least three independent experiments.

**Figure S4:** Co-localization of nucleoporins in MRC5 cells with centrosomes and cilia.

(A) MRC5 cells were immunostained with anti-NUP214, anti-NUP62, anti-NUP93, and anti-NUP153 antibodies, respectively, (red) and anti- $\gamma$ -tubulin antibodies (green).

(B) Sub-confluent MRC5 fibroblasts were serum starved for 48 h, fixed, and stained (in red) for NUP214, NUP62, NUP98, and NUP93 as well as acetylated  $\alpha$ -tubulin (green).

(C) DOK7 (in red) localizes to the axoneme of the PC in sub-confluent MRC5, FADS 1, and FADS 2 fibroblasts that were serum starved for 48 h. Cilia were visualized by anti-acetylated  $\alpha$ -tubulin staining (green). (D) No cilia association was seen for MuSK (in red). DNA was visualized by DAPI.

Shown are representative confocal images. Scale bars, 10  $\mu$ m.

**Figure S5:** (A) PLA control assays. MRC5 cells were processed for PLA using either

the probes only or the antibodies only in order to rule out false positive PLA foci. (B)

Intercept regression model of Figure 2 A. Growth curve analysis was done using multilevel regression technique using R Studio. The intercept model presented here suggests constant differences in proliferation randomly assigned to the different cell lines and the linear model (Fig. 2 A) suggests effects of the different cell lines on proliferation. Statistical comparison of these two models revealed that the linear model is our regression model of choice. Data points show the mean at the specific time point and the point range show the SEM.

Figure 1

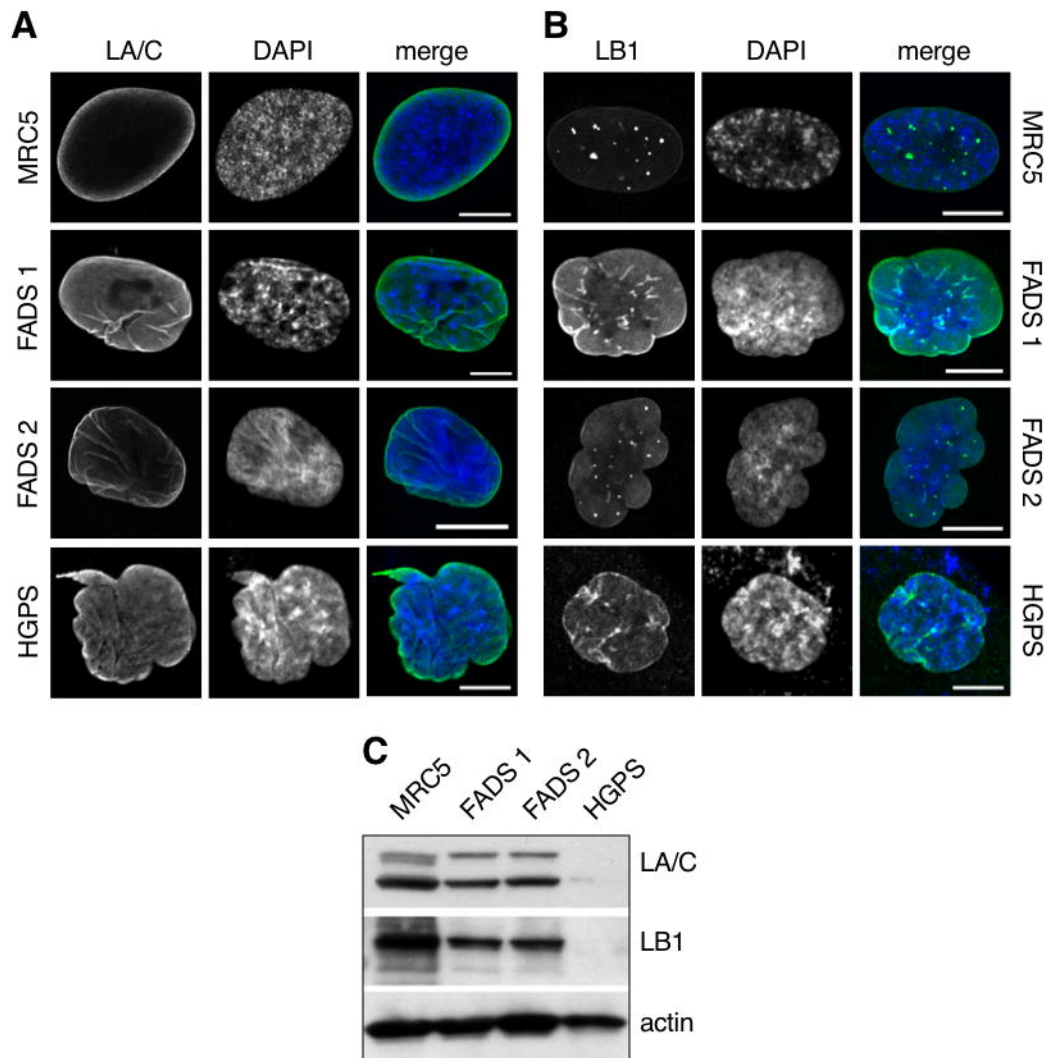

Figure 2

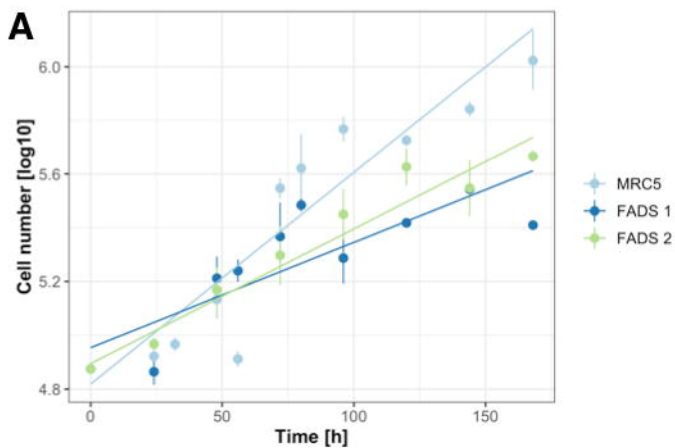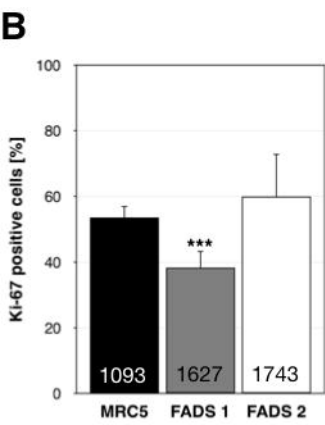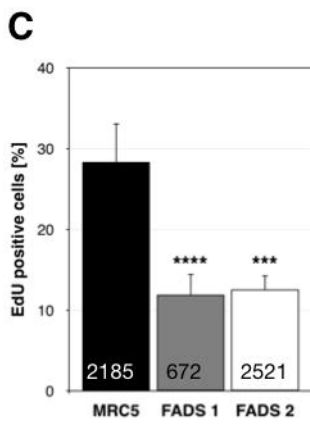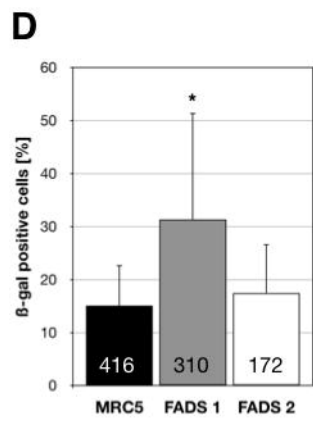





Figure 4

**A**

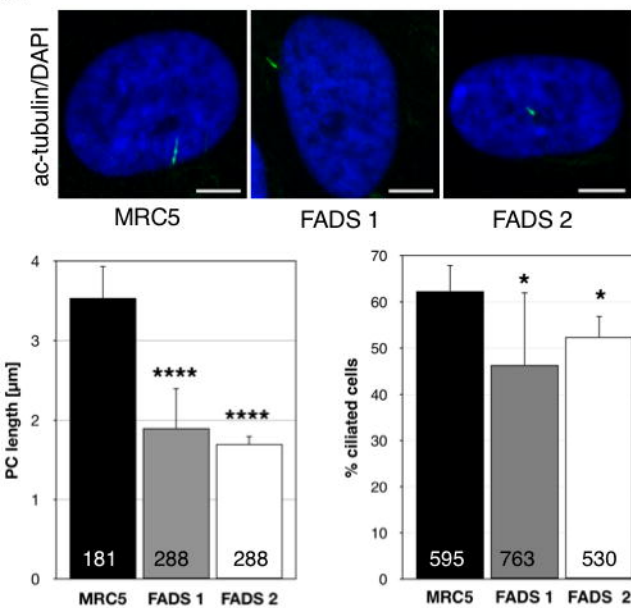

**B**

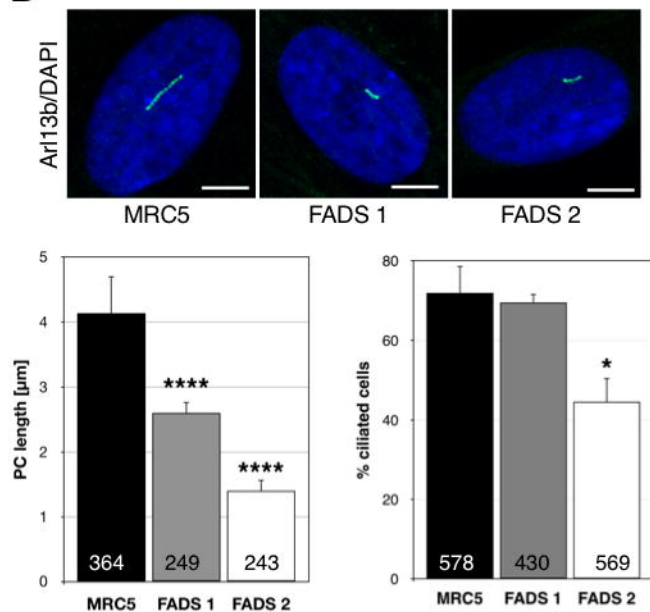

**C**

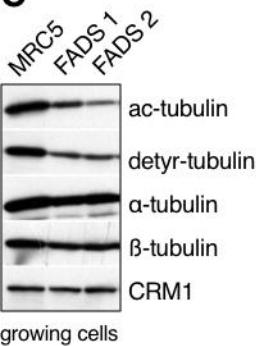

**D**

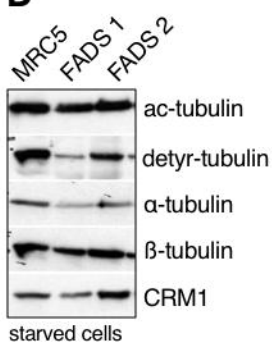

**E**

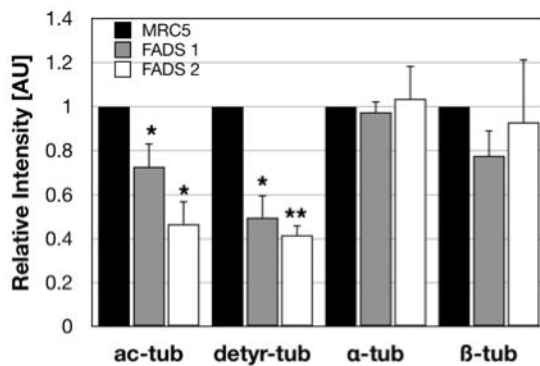

Figure 5

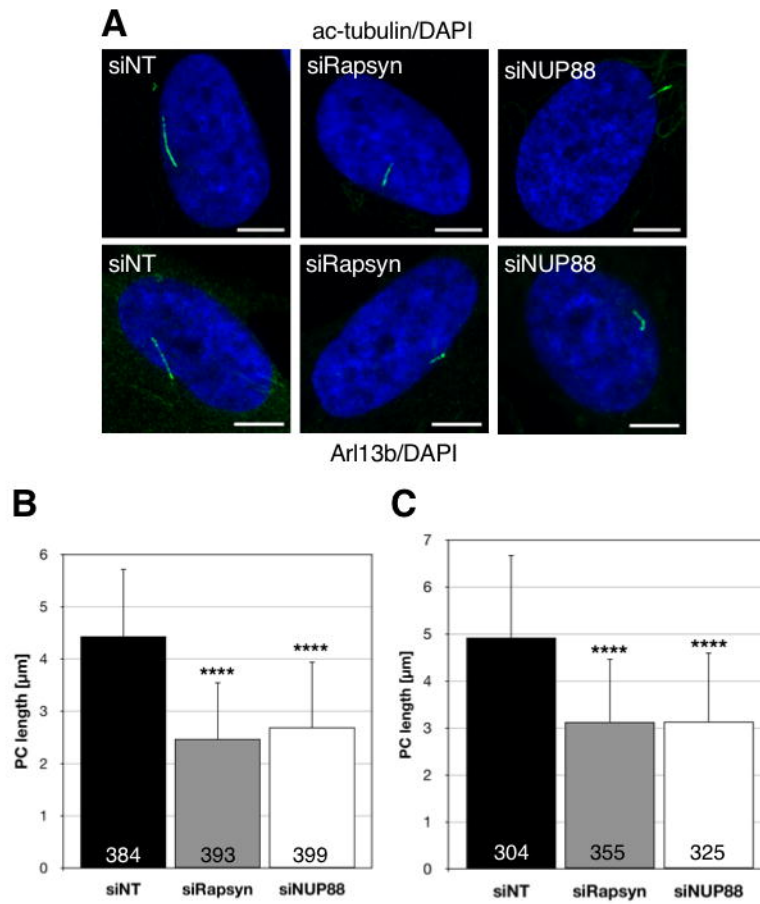

Figure 6

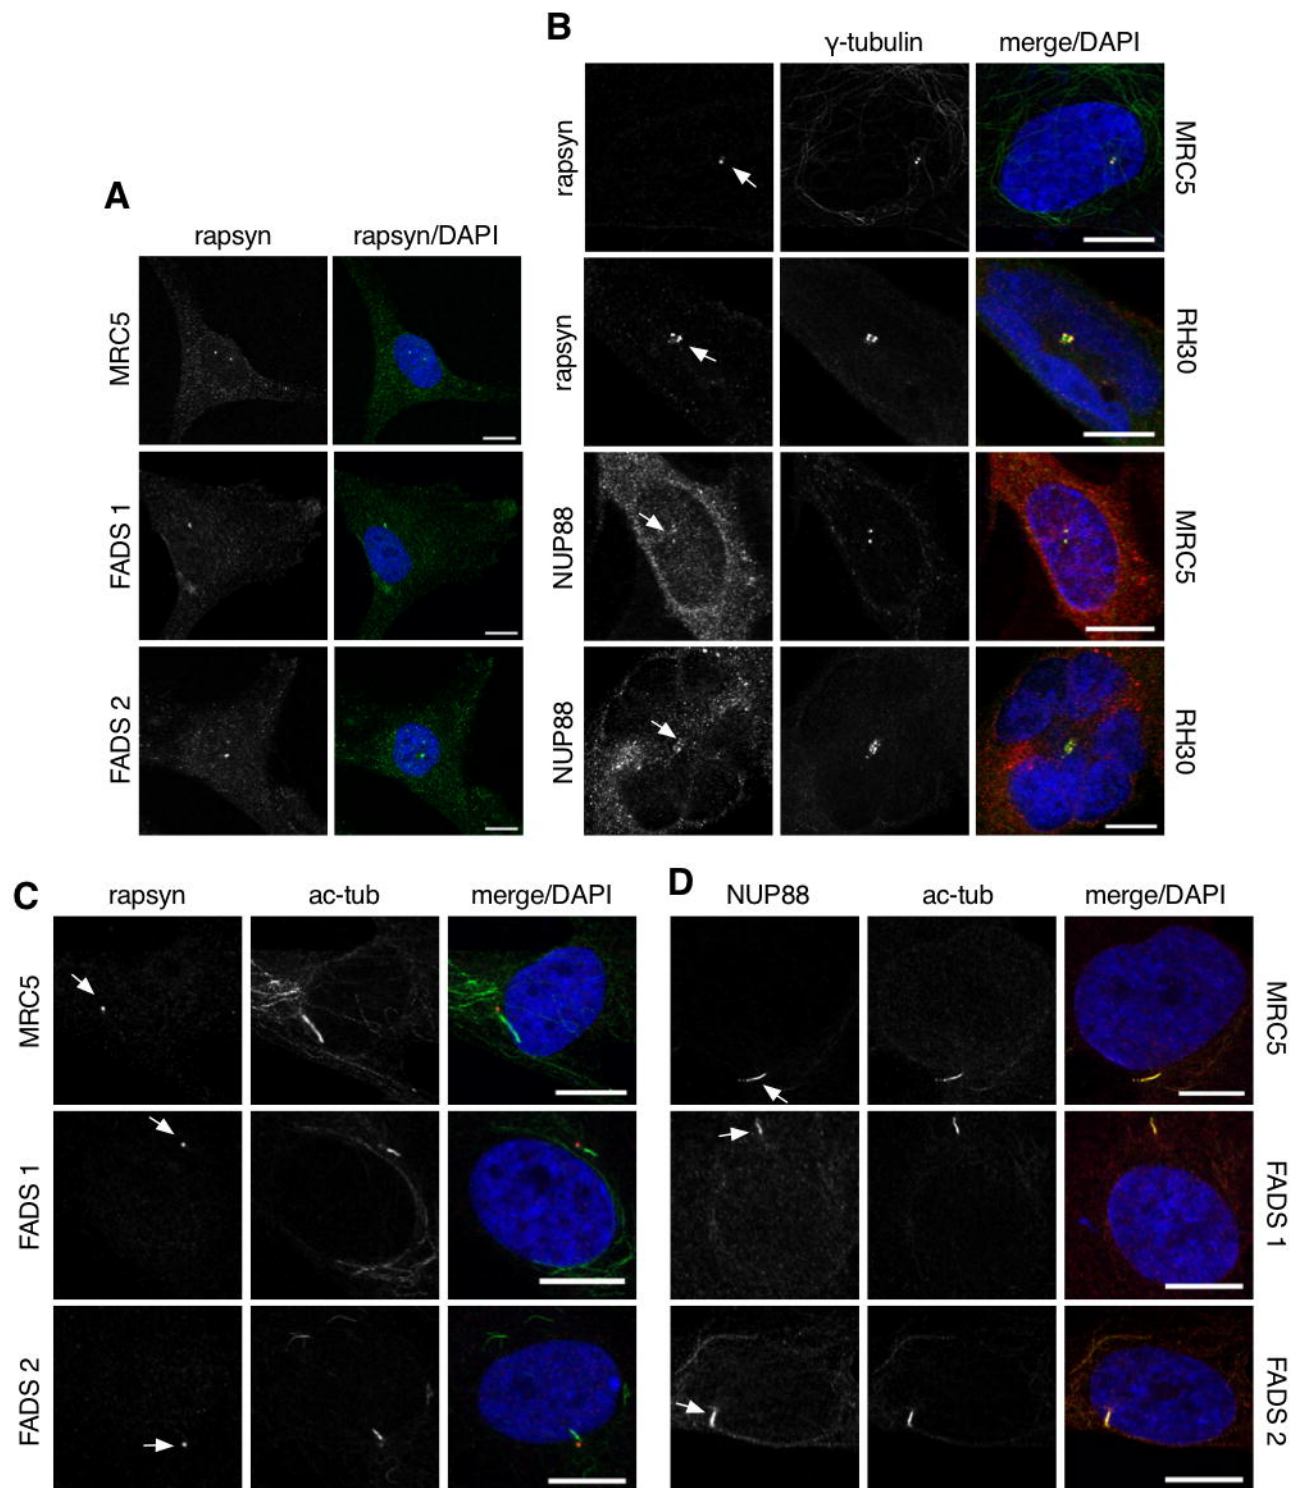

Figure 7

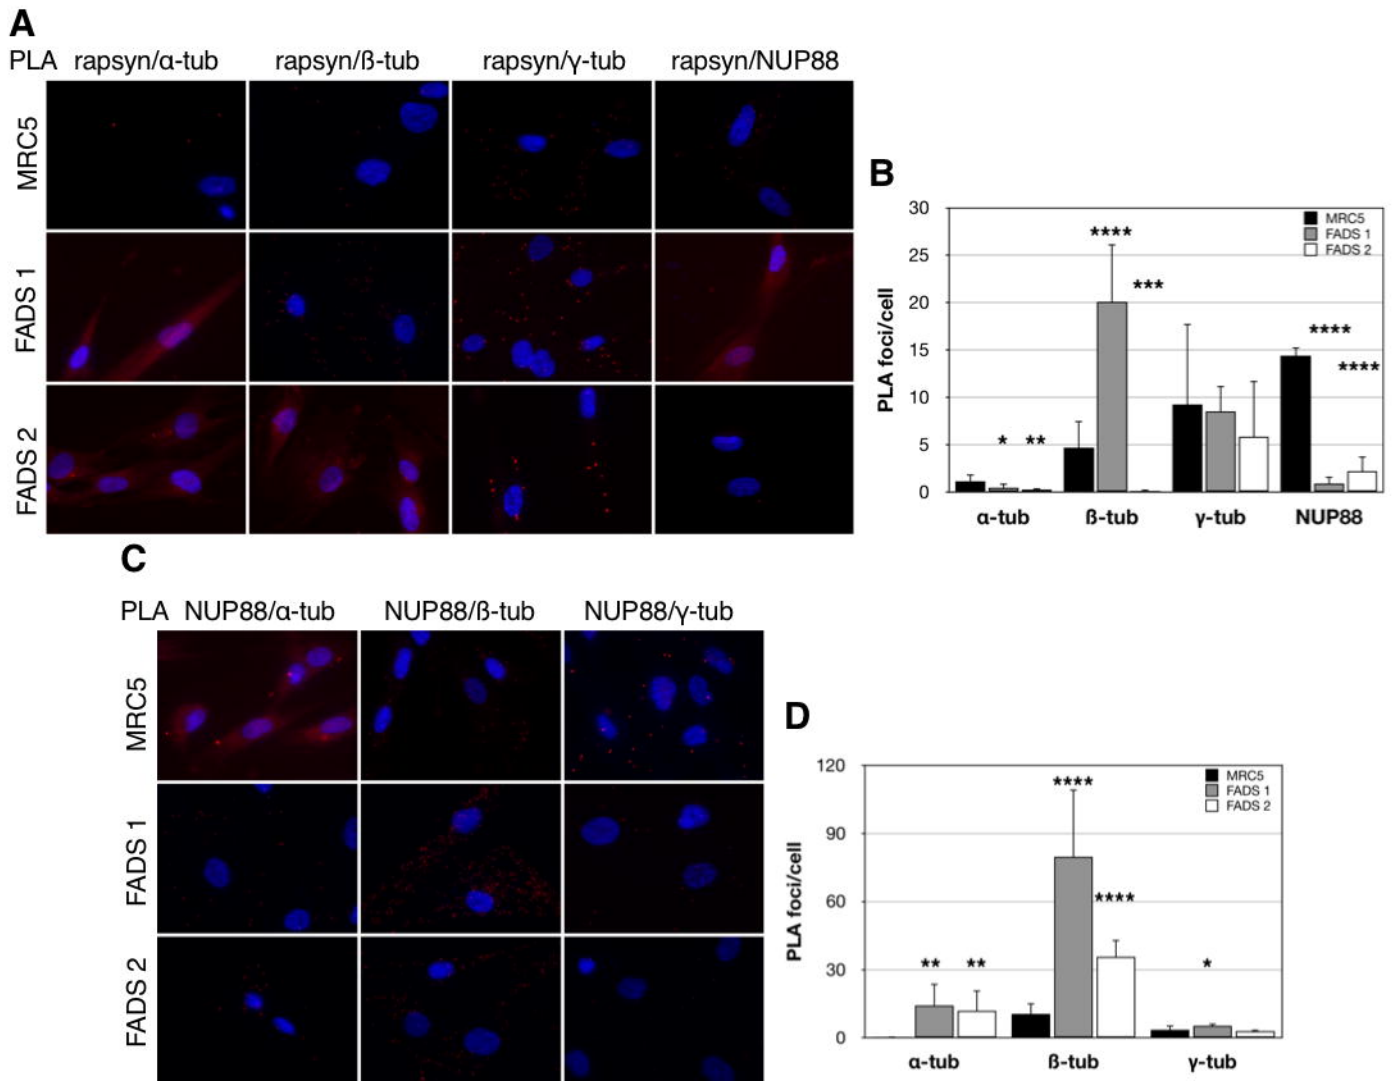

Figure 8

**A**

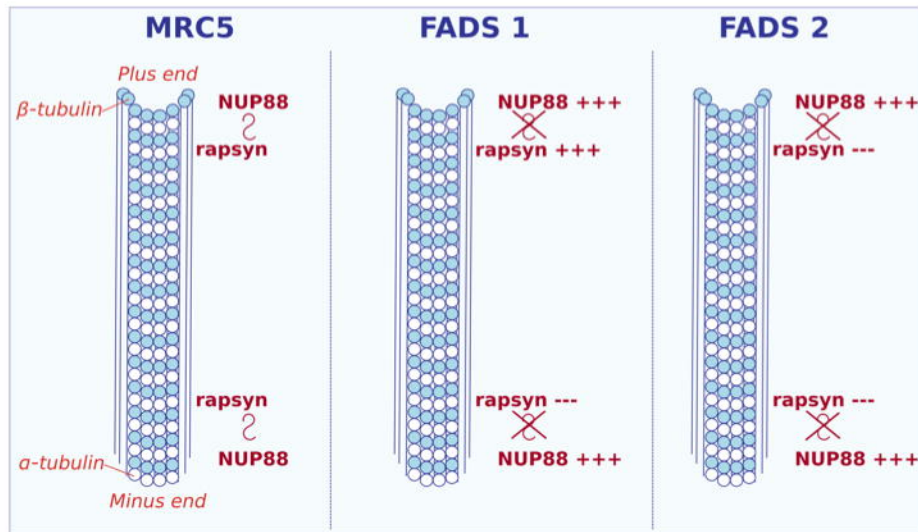

**B**

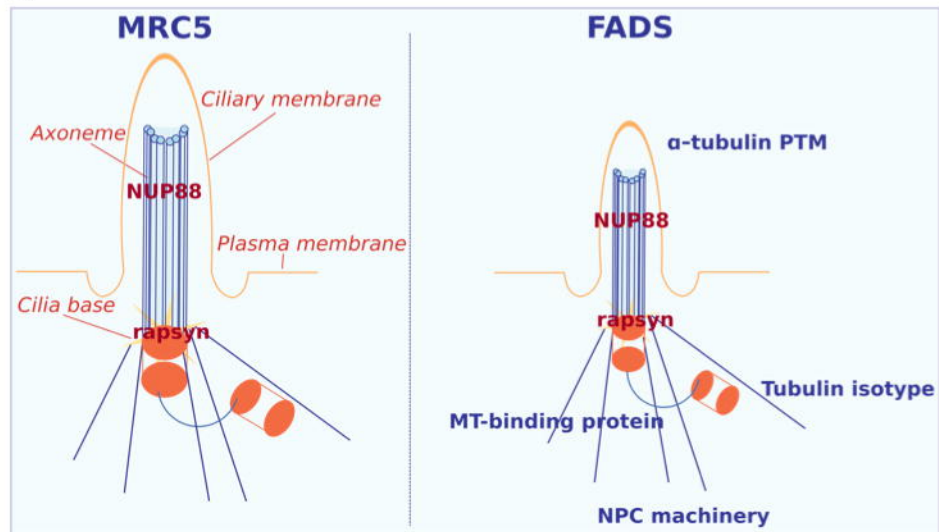

**Table 1:** Cilia localisation of rapsyn and NUP88 in control and FADS fibroblasts.

|        | <b>MRC5</b> | <b>FADS 1</b> | <b>FADS 2</b> |
|--------|-------------|---------------|---------------|
| rapsyn | 97.4 ± 1.2  | 94.8 ± 2.6    | 97.0 ± 0.9    |
| NUP88  | 94.4 ± 2.9  | 86.9 ± 10.6   | 95.2 ± 1.1    |

Numbers are in percent ± standard deviation. Absolute number of analysed cilia: rapsyn: MRC5, 233; FADS 1, 219; FADS 2, 243; NUP88: MRC5, 200; FADS 1, 289; FADS 2, 146
